1

2 **Microbiome variability of mosquito lines is consistent over time and across**  
3 **environments**

4

5 Anastasia Accoti<sup>1\*</sup>, Shannon Quek<sup>2\*</sup>, Julia Vulcan<sup>1</sup>, Cintia Cansado-Utrilla<sup>2</sup>, Enyia R Anderson<sup>2</sup>,  
6 Jessica Alsing<sup>3</sup>, Hema P. Narra<sup>4</sup>, Kamil Khanipov<sup>3</sup>, Grant L. Hughes<sup>2</sup>, Laura B. Dickson<sup>1,5</sup>

7

8 1: Department of Microbiology and Immunology, University of Texas Medical Branch, Galveston  
9 Texas

10 2: Departments of Vector Biology and Tropical Disease Biology, Centre for Neglected Tropical  
11 Disease, Liverpool School of Tropical Medicine, Liverpool L3 5QA, United Kingdom.

12 3: Department of Pharmacology and Toxicology, University of Texas Medical Branch,  
13 Galveston, Texas

14 4: Department of Pathology, University of Texas Medical Branch, Galveston, Texas

15 5: Center of Vector Borne and Zoonotic Diseases, University of Texas Medical Branch,  
16 Galveston, Texas

17 \*These authors contributed equally to this work

18

19 **Abstract**

20 The composition of the microbiome is shaped by both environment and host genetic  
21 background in most organisms, but in the mosquito *Aedes aegypti* the role of host genetics in  
22 shaping the microbiome is poorly understood. Previously, we had shown that four lines of *Ae.*  
23 *aegypti* harbored different microbiomes when reared in the same insectary under identical  
24 conditions. To determine whether these lines differed from each other across time and in  
25 different environments, we characterized the microbiome of the same four lines of *Ae. aegypti*  
26 reared in the original insectary and at another institution. While it was clear that the environment  
27 influenced the microbiomes of these lines, we did still observe distinct differences in the  
28 microbiome between lines within each insectary. Clear differences were observed in alpha  
29 diversity, beta diversity, and abundance of specific bacterial taxa. To determine if the line  
30 specific differences in the microbiome were maintained across environments, pair-wise  
31 differential abundances of taxa was compared between insectaries. Lines were most similar to  
32 other lines from the same insectary than to the same line reared in a different insectary.  
33 Additionally, relatively few differentially abundant taxa identified between pairs of lines were  
34 shared across insectaries, indicating that line specific properties of the microbiome are not  
35 conserved across environments, or that there were distinct microbiota within each insectary.  
36 Overall, these results demonstrate that mosquito line can shape the microbiome across  
37 microbially- diverse environments and host by microbe interactions affecting microbiome  
38 composition and abundance is dependent on environmentally available bacteria.

39

## 40 **Author Summary**

41 The mosquito microbiome plays a critical role in shaping interactions with human pathogens.  
42 The factors that contribute to shaping the composition of the mosquito microbiome are of high  
43 importance due to its role in pathogen interactions and the successful development of control  
44 strategies. In other organisms, both host genetics and environment shape the microbiome  
45 composition, but the role of host genetics in shaping the mosquito microbiome is less clear.  
46 Previously, we have shown that different lines of *Aedes aegypti* harbor different microbiomes  
47 when reared in the same environment. We were curious to see if these differences could still be  
48 detected after further generations in the same insectary and across environments in a different  
49 insectary. We found that found that the microbiome differed between these lines in each  
50 insectary indicating an element of both host genetic background and environment play a role in  
51 establishing the microbiome. Our results indicate that different genetic backgrounds of *Ae.*  
52 *aegypti* will interact with their environment differently to shape their microbiome, which could  
53 potentially influence interactions with human pathogens and/or the effectiveness of control  
54 strategies. More broadly, our results are of interest for the ecology of host-microbe interactions.

55

## 56 **Introduction**

57 The microbiome plays a crucial role in the health of various organisms [1, 2]. Alterations in the  
58 relative abundance and overall bacterial community structure can lead to dysbiosis within the  
59 organism resulting in disease or morbidity. Factors that shape the acquisition and maintenance  
60 of the microbiome vary between organisms and include contributions from both the environment  
61 and the host. The role of host genotype in shaping the composition of the microbiome has  
62 become apparent in mammalian systems where specific host genomic loci have been  
63 associated with specific bacterial taxa [3-5]. Additionally, the role of host genetic background in  
64 invertebrates such as *Drosophila* and other insects has also been shown to contribute to the  
65 composition of the microbiome [6-9]. While the contribution of host genetic background in

66 shaping the microbiome is well studied in mammalian and *Drosophila* systems, few and  
67 contradictory data exist for the role of host genetic background in shaping the microbiome of the  
68 mosquito [10-12].

69  
70 *Aedes aegypti* is the main vector of arthropod-borne viruses (arboviruses) worldwide, such as  
71 dengue, Zika, and chikungunya. Examples such as dengue virus (DENV) result in 100-400  
72 million infections annually and remain a major threat to public health [13, 14]. The microbiome,  
73 specifically the presence of distinct isolates, plays a role in the ability of *Ae. aegypti* to be a  
74 successful vector of human pathogens [15, 16]. The microbiome of *Ae. aegypti* is largely  
75 shaped by the environment [17, 18], but the role of host genetic background remains poorly  
76 understood. Multiple studies have controlled for environmental variation and characterized the  
77 microbiome of diverse lines of *Ae. aegypti* reared in the same insectary (i.e. the same  
78 environment). These studies have found contradictory results. Two independent studies  
79 identified differences in the microbiome from the whole body of *Ae. aegypti* that were dependent  
80 on mosquito line [10, 11]. A third study did not observe any differences in either the bacterial  
81 community structure or the abundance of specific taxa in the midgut from a selection of  
82 genetically diverse lines of *Ae. aegypti*, which represented their worldwide genetic diversity [12].  
83 These contradictory results suggest that perhaps the environment is important for detecting line  
84 specific differences in the microbiome, or alternatively, there are host and environmental  
85 interactions that determine the microbiome composition in *Ae. aegypti*.

86  
87 *Aedes aegypti* occupies a variety of environments worldwide, allowing for the association of  
88 numerous bacterial taxa with it. Understanding the relative contributions of *Ae. aegypti* genetic  
89 background and the environment in shaping the microbiome composition is important for both  
90 teasing apart the role of the microbiome in mosquito vectorial capacity, [15] as well as  
91 development of paratransgenic control tools [19-21]. To understand whether line specific

92 differences in the microbiome is dependent on the environment, we sequenced the 16s  
93 ribosomal RNA gene from four lines of *Ae. aegypti* that previously showed line specific  
94 differences in the microbiome [10] and the same four lines after being transferred to a new  
95 insectary at another institution. We analyzed the structure of the bacterial community between  
96 and within each insectary, as well as the differential abundance of specific taxa. Finally, we  
97 identify conserved genera that differ in pairwise comparison between lines at each insectary.  
98 Our findings that lines harbor differences in their bacterial composition despite being reared  
99 under identical conditions has important implications when comparing phenotypic effects which  
100 may be sensitive to the microbiome.

## 101 **Materials and Methods**

### 102 ***Ae. aegypti* Mosquitoes**

103 Colonies of *Ae. aegypti* used in this study originated from Galveston, Iquitos, Juchitan, and  
104 Thailand. At UTMB, the generation of the colonies is not known but the colonies have been in  
105 the insectary since 2010 and reared continuously. The colonies were transferred to LSTM in  
106 2018. At each institute the mosquito lines were housed under standard insectary conditions  
107 consisting of 28°C and 70% +/- 10% relative humidity with 12h:12h light dark cycle. Eggs were  
108 hatched in deionized water and larvae were fed fish food. Adults were held in Bugdorm cages  
109 with constant access to 10% sucrose until being harvested.

110

### 111 **DNA Extractions**

112 Three-five days post emergence, *Ae. aegypti* were cold anesthetized and females taken for  
113 surface sterilization. Individual mosquitoes were surface sterilized in ethanol 70% for 5 minutes  
114 followed by 3 washes in sterile PBS. DNA was extracted from 20 female mosquitoes from  
115 Galveston, Iquitos, Juchitan and Thailand using the QIAamp DNA Mini Kit (QIAGEN) following  
116 the manufacturer protocol with the following modifications: initial volume of 180ul of buffer ATL  
117 used for mosquito homogenization and final volume of 100ul nuclease-free water for DNA

118 elution. No RNase A treatment was applied. For the UTMB samples, DNA from mosquitoes  
119 from Iquitos and Juchitan was extracted on 25 February 2021 and DNA from mosquitoes from  
120 Galveston and Thailand was extracted on 26 February 2021. No-mosquito controls were used  
121 for each extraction batch and sequenced. The negative control clustered differently from the  
122 samples (Supplemental Figure 1), with the exception of Juchitan.

123

## 124 **Library Preparation and Sequencing**

125 Sequencing libraries for each isolate were generated using universal 16S rRNA V3-V4 region  
126 primers [22] in accordance with Illumina 16S rRNA metagenomic sequencing library protocols.  
127 DNA concentrations of each library were determined by Qubit and equal amounts of DNA from  
128 each barcoded library were pooled prior to sequencing. The samples were barcoded for  
129 multiplexing using Nextera XT Index Kit v2. The pooled libraries were diluted to 4 pM and run on  
130 the Illumina Miseq using a MiSeq Reagent Kit v2 (500-cycles).

131

## 132 **Data Analysis**

133 To identify known bacteria, sequences were analyzed using the CLC Genomics Workbench  
134 21.0.5 Microbial Genomics Module (CLC MGM). Reads containing nucleotides below the quality  
135 threshold of 0.05 (using the modified Richard Mott algorithm) and those with two or more  
136 unknown nucleotides or sequencing adapters were trimmed out. Reference-based Operational  
137 Taxonomic Unit (OTU) picking was performed using the SILVA SSU v132 97% database [23].  
138 Sequences present in more than one copy but not clustered to the database were placed into  
139 de novo OTUs (97% similarity) and aligned against the reference database with an 80%  
140 similarity threshold to assign the "closest" taxonomical name where possible. Chimeras were  
141 removed from the dataset if the absolute crossover cost was three using a k-mer size of six.  
142 OTUs with a combined abundance of less than two were removed from the analysis. Low  
143 abundance OTUs were removed from the analysis if their combined abundance was below 10

144 or 0.1% of reads. Differential abundance analysis was performed using CLC MGM at the genus  
145 level to compare the differences between the groups using trimmed mean of M-values. Each  
146 OTU was modeled as a separate generalized linear model, where it is assumed that  
147 abundances follow a negative binomial distribution. The Wald test was used to determine  
148 significance between groups. Tables of differentially abundant taxa are on the complete  
149 unfiltered data set (Supplemental Tables 1 and 2). To perform the analyses of the number of  
150 genera differentially abundant shared between various pairwise comparisons, the ID of the  
151 genera from the filtered OTU table were pulled out of the full data file using the “join” command  
152 in R. Only the ID of genera from the filtered OTU table were used.

153

154 Abundance profiling was performed using MicrobiomeAnalyst [24, 25]. The analysis parameters  
155 were set so that OTUs had to have a count of at least 10 in 20% of the samples and above 10%  
156 inter-quantile range. Analysis was performed using actual and total sum scale abundances.  
157 Alpha diversity was measured using the observed features to identify the community richness  
158 using Chao1. Statistical significance was calculated using T-test/ANOVA. Beta diversity was  
159 calculated using the Bray-Curtis dissimilarity measure (genus level). Permutational Multivariate  
160 Analysis of Variance (PERMANOVA) analysis was used to measure effect size and significance  
161 on beta diversity for grouping variables [26]. Relative abundance analysis was done in  
162 MicrobiomeAnalyst at the level of genera.

163

#### 164 **Upset plot**

165 To identify the distribution of bacteria taxa between the different mosquito lines and their rearing  
166 insectaries, count data from female mosquitoes were extracted and aggregated to the genus  
167 level for each sample. This yielded a maximum of 44 distinct bacterial taxa (including  
168 'uncultured' and 'ambiguous' taxa). This table of count data was then processed using the R  
169 package UpsetR [27], stratifying the data based on mosquito strain and the rearing insectary.

170

## 171 **Correlation plot**

172 Previous studies have indicated a potential correlation in presence/absence between specific  
173 genera of bacteria- namely *Cedecea*, *Enterobacter*, *Klebsiella*, and *Serratia*. To test for this,  
174 counts from the four genera were extracted from the aggregated table described earlier. Using  
175 the sum of these counts as the total, percentage relative abundance for each taxa was then  
176 counted per individual sample. These results were then passed to the `cor()` function in R's stats  
177 package [28] to obtain a correlation matrix of size four-by-four. This correlation matrix was then  
178 visualised using the R package `corrplot` [29], with the two options `method = "color"`, `col =`  
179 `COL2('PiYG')`.

180

181

## 182 **Results**

### 183 **Between Insectary Differences**

184 We previously reported that the microbiomes of four *Ae. aegypti* lines reared in the same  
185 insectary were different [10]. To confirm whether these differences were conserved across  
186 subsequent generations and environments, we characterized the microbiome of these lines in  
187 the insectary that they have been continuously reared in (UTMB) and an insectary at a different  
188 institution (LSTM) after being transferred and reared for multiple generations. To compare the  
189 microbiome diversity and composition between lines we undertook amplicon sequencing on the  
190 V4-V5 region of the bacterial 16s rRNA gene from 20 individuals from each line. Out of the 160  
191 individuals sequenced, a total of 79 OTUs were found which represented 44 bacterial genera.  
192 Rarefaction curves (Supplemental Figure 1) show that sufficient sequencing depth was  
193 achieved.

194



195 To determine if the microbiome of each *Ae. aegypti* line differed in diversity of bacterial species  
196 present, the within line diversity was determined by calculating the Chao Diversity index (Figure  
197 1A). The richness of the microbiome was greater in mosquitoes reared in the LSTM insectary  
198 compared to those reared in the UTMB insectary ( $p$ -value  $< 0.001$ ). To determine if the  
199 community structure of any one line was more closely related to the same line reared at a  
200 different insectary, or different lines reared within the same insectary, principal component  
201 analysis (PCA) was performed on a Bray-Curtis dissimilarity matrix. Overall, individuals from  
202 each line shared a more similar bacterial community structure with other lines from the same  
203 insectary (Figure 1B), indicating that the environment and non line-specific factors plays a more  
204 influential role in shaping the community structure of the microbiome.

205

#### 206 **Within Insectary Differences**

207 To determine whether the lines differed from each other within the same insectary, alpha and  
208 beta diversity was compared between the lines from each insectary. Differences in species  
209 richness were observed between the lines at both the LSTM insectary (Figure 2A) ( $p$ -value  $<$   
210  $0.001$ ) and the UTMB insectary (Figure 2C) ( $p$ -value  $< 0.001$ ). To gauge if the lines differed in  
211 the bacterial community structure, PCA was performed on a Bray-Curtis dissimilarity matrix. The  
212 PCA plots show that the bacterial communities differ between the lines at both the LSTM  
213 insectary (Figure 2B) ( $p$ -value:  $0.001$ ) and the UTMB insectary (Figure 2D) ( $p$ -value:  $0.001$ ).  
214 Strikingly, these results indicate that differences in the bacterial community structure of these  
215 four lines are maintained across generations and insectaries.

216

217 To measure the extent of overlap of bacteria identified between the two insectaries, the  
218 presence of each genera was compared between each line from each insectary (Figure 3). Out  
219 of the 44 identified genera, 23 were present in both insectaries. Six genera are specific to the  
220 UTMB insectary, and three genera were specific to the LSTM insectary (Supplemental Table 3).

221 We examined the relative abundance of the 20 most abundant genera for each line to determine  
222 if the bacterial communities were dominated by the same bacterial genera in each line at both  
223 insectaries. Different bacteria genera dominated mosquitoes reared in the LSTM insectary  
224 compared to the UTMB insectary (Figure 4). However, within both insectaries, the Juchitan lines  
225 showed the greatest difference in the relative abundance of different taxa compared to the other  
226 lines. All four lines reared in the LSTM insectary were dominated by an ambiguous taxa,  
227 *Perfucidibaca*, and *Chryseobacterium*. The four lines reared in the UTMB insectary had a high  
228 proportion of *Acinetobacter*, *Psuedomonas*, and *Asaia*.

229  
230 We previously reported a correlation between Enterobacteriaceae bacteria and *Serratia* in *Ae.*  
231 *aegypti* [10]. Specifically, if the midgut of *Ae. aegypti* was colonized with Enterobacteriaceae,  
232 *Serratia* was excluded from colonizing. The robustness of this phenotype after multiple  
233 generations and in different environments was measured. We found that this negative  
234 correlation between the presence of Enterobacteriaceae and the presence of *Serratia* was still  
235 observable in these lines (Supplemental Figure 2).

236

### 237 **Environment versus Line Specific Differences**

238 To understand if line specific differences are conserved across environments, pair-wise  
239 differences in the abundance of each bacterial genera were calculated between lines within and  
240 across insectaries (Supplemental Tables 1 and 2). Out of the 44 genera identified, a range of  
241 16-38 genera were found in different abundances between lines within each insectary resulting  
242 in 36-86% similarity between the lines (Figure 5). To assess whether line specific factors or the  
243 environment play a larger role in shaping the microbiome, the percentage of genera differentially  
244 abundant was compared for each pairwise comparison within and between insectaries. Lines  
245 were more similar to lines from the same insectary than to the matching line in the other

246 insectary (Figure 5), indicating the environment is more important than line specific factors in  
247 shaping the microbiome.

248

249 To assess if lines differ from each other in the same way across environments, pairwise  
250 comparisons of lines were performed within each insectary, and genera that showed statistically  
251 differential abundances were identified per comparison. If we identify conservation of  
252 differentially abundant genera between the same two lines reared in different environments, this  
253 would suggest an interaction between specific bacterial genera and the hosts' background  
254 across environments. Overall, a range of 11-19 genera were identified as having conserved  
255 differences in their abundance between the same lines in each insectary (Figure 6). The  
256 proportion of differentially abundant genera between lines that were shared between institutes is  
257 dependent on the specific pairwise comparison (Figure 6, Supplemental table 4). In pairwise  
258 comparisons between the Galveston vs Iquitos and Galveston vs Juchitan lines, roughly half of  
259 the differentially abundant bacteria are conserved across insectaries. In the other four pairwise  
260 comparisons, more than half of the differentially abundant bacteria are conserved across  
261 insectaries, indicating that the structuring of the microbiome between lines from the same  
262 environment is partially conserved across environments.

263

## 264 **Discussion**

265

266 We explored the contribution of mosquito line and environment in shaping the microbiome  
267 composition of *Ae. aegypti*. Having previously observed differences in the microbiome between  
268 four lines of *Ae. aegypti* reared under identical conditions in the same insectary [10], we sought  
269 to determine if these lines continue to have distinct microbiomes since our previous work, and if  
270 this was consistent after rearing in different insectary environments. In accordance with our  
271 previous study [10], we observed differences in alpha and beta diversity between the four lines

272 and interestingly, the microbiome of these lines were still distinct after rearing in separate  
273 insectaries. Notably, we found that although the microbiomes of the lines differed from each  
274 other within an insectary, any one line was more similar to other lines reared within the same  
275 insectary as compared to the same line at the other insectary. Finally, we observed a  
276 percentage of differentially abundant genera between lines were shared between insectaries.  
277 Together these data demonstrate that while the environment influences the microbiome  
278 available to the organisms, host factors still play a role in shaping the microbiome.

279  
280 The role of host genotype in determining the microbiome composition has been established in  
281 other systems [3-9]. Although the influence of mosquito genotype in shaping the microbiome in  
282 the same environment is not well understood, multiple mosquito genes have been identified that  
283 influence the composition of the microbiome and gut homeostasis [11, 30-33]. Genes involved  
284 in bloodmeal digestion and immune factors can regulate the abundance of the microbiome as a  
285 whole [33], or the abundance of specific taxa [30]. Furthermore, the mosquito microbiome can  
286 stimulate expression of specific genes to shape the immune status of the mosquito allowing for  
287 efficient colonization of specific microbes [32]. In addition to immune genes regulating  
288 microbiome composition, metabolic signaling and nutrition status of the mosquito can influence  
289 the microbiome [11, 15]. Immunity and nutritional processes are under genetic control and  
290 different genotypes of *Ae. aegypti* could result in differences in levels of micro- and  
291 macronutrients, which in turn could influence the ability of specific bacteria to colonize that  
292 mosquito line. Additionally, genetic variation in immune genes could influence the success of  
293 different bacteria in colonizing the mosquito.

294  
295 If mosquito line played a more profound role than the environment in determining which genera  
296 colonize the mosquito, we would expect the same line at the two insectaries to share more  
297 similarities to each other than the other lines within the same insectary, assuming similar taxa

298 were available to the mosquito across insectaries. Additionally, this would be apparent if  
299 pairwise differences in taxa abundance between any two lines within one insectary were  
300 conserved in another insectary. We observed the opposite of this where lines within one  
301 insectary had more similar abundances of specific genera to each other, compared to the same  
302 line reared at a different insectary. We also observed that pairwise differences in the abundance  
303 of different genera between lines within one insectary were not shared in another insectary. This  
304 lack of shared differences in the abundance of specific genera within a line across institutes  
305 suggest that the environment, or the microbes the mosquito has access to, plays a larger role  
306 than host specific factors in determining the microbiome. Given that only 25 of the 44 genera  
307 identified were shared across insectaries, it is not surprising that line specific abundances of  
308 specific taxa are lost across insectaries.

309

310 This study and previous studies observed differences in the microbiome between the lines when  
311 reared under identical conditions in the same insectary [10]. This is contrast to our previous  
312 work in which midguts from diverse genotypes of *Ae. aegypti* harbored the same microbiome  
313 when reared under identical conditions [12]. The discrepancy between these studies could be a  
314 result of what tissues were used for microbiome characterization. Kozlova et al. [10] and this  
315 study sequenced the microbiome from the whole mosquito, while Dickson et al. [12] sequenced  
316 the midgut microbiome. Additionally, it is possible that the environmental bacteria present in the  
317 insectary in Dickson et al. [12] could colonize the midguts of all the lines effectively, while this  
318 was not the case in the UTMB and LSTM insectaries. Microbe-microbe interactions are  
319 important for determining the microbiome composition [17] and perhaps some of the  
320 environmental bacteria present in both the UTMB and LSTM insectaries are incapable of  
321 colonizing *Ae. aegypti*.

322

323 Given that the lines of *Ae. aegypti* were not sequenced in this study we cannot conclude these  
324 lines represent different genotypes of *Ae. aegypti*. The colonies used in the study represent a  
325 similar genetic background in relation to global populations of *Ae. aegypti* [34, 35]. Without  
326 sequencing the different lines to confirm genetic differences, we cannot unequivocally determine  
327 if the differences we see in the microbiome composition are correlated with mosquito genotype.  
328 Although we expect them to be similar genetically, it is likely that there is genetic divergence  
329 between the lines and it is reasonable to conclude that the differences between the microbiome  
330 between the lines is at least partially genetically controlled.

331

332 The results from this study provide a unique opportunity to tease apart host control of the  
333 microbiome in *Ae. aegypti*. By exploiting our new cryopreservation method [36] and swapping  
334 the microbiome using our recently developed transplantation approach [37] from both lines and  
335 insectaries, the role of the host in controlling the microbiome could be further investigated and  
336 provide insight into host genetic mechanisms that underly microbiome composition.

337

### 338 **Acknowledgements.**

339 LBD was supported by UTMB start-up funds. GLH was supported by the BBSRC  
340 (BB/T001240/1, BB/V011278/1, BB/X018024/1, and BB/W018446/1), the UKRI (20197), a  
341 Royal Society Wolfson Fellowship (RSWF\R1\180013), the NIHR (NIHR2000907) and the Bill  
342 and Melinda Gates Foundation (INV-048598).

343

344

345 **Figure Legends.**

346

347 **Figure 1: Diversity of the microbiome in individuals reared at the LSTM or UTMB**

348 **insectaries.** Structure of bacterial communities was determined by deep sequencing the V3-V4  
349 region of the bacterial 16S gene in adults from 4 different lines of *Ae aegypti* (Galveston,  
350 Thailand, Iquitos, Juchitan) reared in two different insectaries at UTMB and LSTM. The Bacterial  
351 community structure is represented (A) by the species richness index Chao1 and (B) by  
352 principal component analysis of Bray-Curtis dissimilarity index. Mosquito lines reared at LSTM  
353 are shown in purple, mosquitoes reared to UTMB are shown in turquoise.

354

355 **Figure 2: Alpha and beta diversity metrics for the *Ae. aegypti* lines reared at the LSTM**

356 **and UTMB insectaries.** (A, C): The species richness (Chao1 index) was calculated from 20  
357 individuals from each line (Galveston, Thailand, Iquitos, Juchitan) at each insectary. The level of  
358 species richness differed between individuals from the LSTM (p-value < 0.001) and UTMB (p-  
359 value < 0.001). (B,D):The dissimilarities between the 4 different lines of *Ae. aegypti* was  
360 analyzed by principal component analysis of Bray-Curtis dissimilarity index. The bacterial  
361 community structure of the lines differed in individuals from LSTM (p-value = 0.001) and UTMB  
362 (p-value = 0.001).

363

364 **Figure 3: Upset plot showing the number of genera that are shared between lines in the**

365 **LSTM and UTMB insectaries.** Each mosquito strain in the different insectary (one per row at  
366 the bottom half of the image) is treated as a 'set' with an identified number of bacterial taxa ('Set  
367 Size'). The various permutations of intersections are denoted by the ball-and-stick diagram at  
368 the bottom of the image, and size of these intersections denoted by the bar graph at the top of  
369 the image ('Intersection Size'). Rows are colored based on mosquito strain (middle-left), and  
370 further divided into the rearing Insectary (bottom left). 23 taxa are shared across all the different

371 strains between the different insectaries, constituting a potential 'core' set of bacteria. This is  
372 then followed by six (Persicitalea, Janthinobacterium, Rahnella, Uncultured, Luteolibacter,  
373 Verrucomicrobium) and three taxa (Sphingopyxis, Burkholderia-Caballeronia-Paraburkholderia,  
374 Methyloversatilis) that appeared unique to the rearing insectary. All other permutations of  
375 intersects contain two or fewer bacterial taxa.

376

377 **Figure 4: Relative abundance of bacteria in each line.** The dominant bacterial genera are  
378 different between insectaries and between lines. The relative abundance of the 20 most  
379 abundant genera is shown for 20 individuals from each line at LSTM and UTMB insectaries.  
380 Bacterial genera were assigned to OTUs clustered with a 97% sequence identity cutoff and  
381 taxonomically classified with the SILVA database.

382

383 **Figure 5: Pairwise comparisons of mosquito lines reared in each insectary.** The  
384 microbiomes of mosquito lines reared in the same insectary are more similar compared to those  
385 reared in a different insectary. Results from a pairwise differential abundance analysis are  
386 shown for each pair of lines as the percent of genera that are significantly different between the  
387 pairs after correcting for multiple comparisons. A light blue color indicates a higher degree of  
388 dissimilarity between the lines.

389

390 **Figure 6: Few genera have conserved differences in abundance between lines at both**  
391 **insectaries.** Venn diagrams show the overlap in specific genera that are differentially abundant  
392 between each pair of lines (Galveston, Iquitos, Thailand, or Juchitan) at each insectary (LSTM  
393 or UTMB). The ID of genera differentially abundant between each pairwise comparison was  
394 compared between insectaries. The shared genera represent a genus that is differentially



395 abundant between the lines in both environments. The ID of shared genera can be found in  
396 supplemental table 4.

397

398

### 399 **Supplemental figures**

400

401 **Supplemental Figure 1:** Rarefaction curves showing the sequencing depth of each library. The  
402 number of species is shown on the Y axis, and the number of sequencing reads is shown on the  
403 X axis.

404

405 **Supplemental Figure 2:** Heatmap showing the correlation between bacterial taxa co-  
406 occurrence between the different mosquito strains and rearing insectaries. Saturated greens  
407 indicate strong co-occurrence between the bacteria taxa, while saturated purple indicates  
408 strong exclusion, and whites indicate no positive or negative correlation. We show that  
409 *Klebsiella* co-occurs with *Enterobacter* taxa, whilst *Serratia* and *Cedecea* taxa appear to exclude  
410 other bacterial taxa.

411

412 **Supplemental Figure 3:** Beta diversity metrics for the *Ae. aegypti* lines reared at the UTMB  
413 insectary. The dissimilarities between the 4 different lines of *Ae. aegypti* plus the negative  
414 control was analyzed by principal component analysis of Bray-Curtis dissimilarity index.

415

416

417

418

419

420

421 **References**

422

- 423 1. Engel, P. and N.A. Moran, *The gut microbiota of insects - diversity in structure and*  
424 *function*. FEMS Microbiol Rev, 2013. **37**(5): p. 699-735 DOI: 10.1111/1574-6976.12025.
- 425 2. Fan, Y. and O. Pedersen, *Gut microbiota in human metabolic health and disease*. Nat Rev  
426 Microbiol, 2021. **19**(1): p. 55-71 DOI: 10.1038/s41579-020-0433-9.
- 427 3. Spor, A., O. Koren, and R. Ley, *Unravelling the effects of the environment and host*  
428 *genotype on the gut microbiome*. Nat Rev Microbiol, 2011. **9**(4): p. 279-90 DOI:  
429 10.1038/nrmicro2540.
- 430 4. Bubier, J.A., E.J. Chesler, and G.M. Weinstock, *Host genetic control of gut microbiome*  
431 *composition*. Mamm Genome, 2021. **32**(4): p. 263-281 DOI: 10.1007/s00335-021-09884-  
432 2.
- 433 5. Hughes, D.A., R. Bacigalupe, J. Wang, M.C. Ruhlemann, R.Y. Tito, G. Falony, M. Joossens,  
434 S. Vieira-Silva, L. Henckaerts, L. Rymenans, C. Verspecht, S. Ring, A. Franke, K.H. Wade,  
435 N.J. Timpson, and J. Raes, *Genome-wide associations of human gut microbiome*  
436 *variation and implications for causal inference analyses*. Nat Microbiol, 2020. **5**(9): p.  
437 1079-1087 DOI: 10.1038/s41564-020-0743-8.
- 438 6. Chaston, J.M., A.J. Dobson, P.D. Newell, and A.E. Douglas, *Host Genetic Control of the*  
439 *Microbiota Mediates the Drosophila Nutritional Phenotype*. Appl Environ Microbiol,  
440 2016. **82**(2): p. 671-9 DOI: 10.1128/AEM.03301-15.
- 441 7. Early, A.M., N. Shanmugarajah, N. Buchon, and A.G. Clark, *Drosophila Genotype*  
442 *Influences Commensal Bacterial Levels*. PLoS One, 2017. **12**(1): p. e0170332 DOI:  
443 10.1371/journal.pone.0170332.
- 444 8. Bulteel, L., S. Houwenhuyse, S.A.J. Declerck, and E. Decaestecker, *The Role of*  
445 *Microbiome and Genotype in Daphnia magna upon Parasite Re-Exposure*. Genes (Basel),  
446 2021. **12**(1) DOI: 10.3390/genes12010070.
- 447 9. Douglas, A.E., *The Drosophila model for microbiome research*. Lab Anim (NY), 2018.  
448 **47**(6): p. 157-164 DOI: 10.1038/s41684-018-0065-0.
- 449 10. Kozlova, E.V., S. Hegde, C.M. Roundy, G. Golovko, M.A. Saldana, C.E. Hart, E.R.  
450 Anderson, E.A. Hornett, K. Khanipov, V.L. Popov, M. Pimenova, Y. Zhou, Y. Fovanov, S.C.  
451 Weaver, A.L. Routh, E. Heinz, and G.L. Hughes, *Microbial interactions in the mosquito*  
452 *gut determine Serratia colonization and blood-feeding propensity*. ISME J, 2021. **15**(1): p.  
453 93-108 DOI: 10.1038/s41396-020-00763-3.
- 454 11. Short, S.M., E.F. Mongodin, H.J. MacLeod, O.A.C. Talyuli, and G. Dimopoulos, *Amino acid*  
455 *metabolic signaling influences Aedes aegypti midgut microbiome variability*. PLoS Negl  
456 Trop Dis, 2017. **11**(7): p. e0005677 DOI: 10.1371/journal.pntd.0005677.
- 457 12. Dickson, L.B., A. Ghoulane, S. Volant, C. Bouchier, L. Ma, A. Vega-Rua, I. Dusfour, D.  
458 Jiolle, C. Paupy, M.N. Mayanja, A. Kohl, J.J. Lutwama, V. Duong, and L. Lambrechts,  
459 *Diverse laboratory colonies of Aedes aegypti harbor the same adult midgut bacterial*  
460 *microbiome*. Parasit Vectors, 2018. **11**(1): p. 207 DOI: 10.1186/s13071-018-2780-1.
- 461 13. Bhatt, S., P.W. Gething, O.J. Brady, J.P. Messina, A.W. Farlow, C.L. Moyes, J.M. Drake,  
462 J.S. Brownstein, A.G. Hoen, O. Sankoh, M.F. Myers, D.B. George, T. Jaenisch, G.R. Wint,  
463 C.P. Simmons, T.W. Scott, J.J. Farrar, and S.I. Hay, *The global distribution and burden of*  
464 *dengue*. Nature, 2013. **496**(7446): p. 504-7 DOI: 10.1038/nature12060.

- 465 14. Wilder-Smith, A., D.J. Gubler, S.C. Weaver, T.P. Monath, D.L. Heymann, and T.W. Scott,  
466 *Epidemic arboviral diseases: priorities for research and public health*. Lancet Infect Dis,  
467 2017. **17**(3): p. e101-e106 DOI: 10.1016/S1473-3099(16)30518-7.
- 468 15. Cansado-Utrilla, C., S.Y. Zhao, P.J. McCall, K.L. Coon, and G.L. Hughes, *The microbiome*  
469 *and mosquito vectorial capacity: rich potential for discovery and translation*.  
470 Microbiome, 2021. **9**(1): p. 111 DOI: 10.1186/s40168-021-01073-2.
- 471 16. Hegde, S., J.L. Rasgon, and G.L. Hughes, *The microbiome modulates arbovirus*  
472 *transmission in mosquitoes*. Curr Opin Virol, 2015. **15**: p. 97-102 DOI:  
473 10.1016/j.coviro.2015.08.011.
- 474 17. Hegde, S., K. Khanipov, L. Albayrak, G. Golovko, M. Pimenova, M.A. Saldana, M.M. Rojas,  
475 E.A. Hornett, G.C. Motl, C.L. Fredregill, J.A. Dennett, M. Debboun, Y. Fofanov, and G.L.  
476 Hughes, *Microbiome Interaction Networks and Community Structure From Laboratory-*  
477 *Reared and Field-Collected Aedes aegypti, Aedes albopictus, and Culex quinquefasciatus*  
478 *Mosquito Vectors*. Front Microbiol, 2018. **9**: p. 2160 DOI: 10.3389/fmicb.2018.02160.
- 479 18. Dickson, L.B., D. Jiolle, G. Minard, I. Moltini-Conclois, S. Volant, A. Ghazlane, C. Bouchier,  
480 D. Ayala, C. Paupy, C.V. Moro, and L. Lambrechts, *Carryover effects of larval exposure to*  
481 *different environmental bacteria drive adult trait variation in a mosquito vector*. Sci Adv,  
482 2017. **3**(8): p. e1700585 DOI: 10.1126/sciadv.1700585.
- 483 19. Wang, G.H., J. Du, C.Y. Chu, M. Madhav, G.L. Hughes, and J. Champer, *Symbionts and*  
484 *gene drive: two strategies to combat vector-borne disease*. Trends Genet, 2022. **38**(7): p.  
485 708-723 DOI: 10.1016/j.tig.2022.02.013.
- 486 20. Saldana, M.A., S. Hegde, and G.L. Hughes, *Microbial control of arthropod-borne disease*.  
487 Mem Inst Oswaldo Cruz, 2017. **112**(2): p. 81-93 DOI: 10.1590/0074-02760160373.
- 488 21. Ratcliffe, N.A., J.P. Furtado Pacheco, P. Dyson, H.C. Castro, M.S. Gonzalez, P. Azambuja,  
489 and C.B. Mello, *Overview of paratransgenesis as a strategy to control pathogen*  
490 *transmission by insect vectors*. Parasit Vectors, 2022. **15**(1): p. 112 DOI: 10.1186/s13071-  
491 021-05132-3.
- 492 22. Klindworth, A., E. Pruesse, T. Schweer, J. Peplies, C. Quast, M. Horn, and F.O. Glockner,  
493 *Evaluation of general 16S ribosomal RNA gene PCR primers for classical and next-*  
494 *generation sequencing-based diversity studies*. Nucleic Acids Res, 2013. **41**(1): p. e1 DOI:  
495 10.1093/nar/gks808.
- 496 23. Quast, C., E. Pruesse, P. Yilmaz, J. Gerken, T. Schweer, P. Yarza, J. Peplies, and F.O.  
497 Glockner, *The SILVA ribosomal RNA gene database project: improved data processing*  
498 *and web-based tools*. Nucleic Acids Res, 2013. **41**(Database issue): p. D590-6 DOI:  
499 10.1093/nar/gks1219.
- 500 24. Dhariwal, A., J. Chong, S. Habib, I.L. King, L.B. Agellon, and J. Xia, *MicrobiomeAnalyst: a*  
501 *web-based tool for comprehensive statistical, visual and meta-analysis of microbiome*  
502 *data*. Nucleic Acids Res, 2017. **45**(W1): p. W180-W188 DOI: 10.1093/nar/gkx295.
- 503 25. Chong, J., P. Liu, G. Zhou, and J. Xia, *Using MicrobiomeAnalyst for comprehensive*  
504 *statistical, functional, and meta-analysis of microbiome data*. Nat Protoc, 2020. **15**(3): p.  
505 799-821 DOI: 10.1038/s41596-019-0264-1.
- 506 26. Anderson, M.J. and J. Santana-Garcon, *Measures of precision for dissimilarity-based*  
507 *multivariate analysis of ecological communities*. Ecol Lett, 2015. **18**(1): p. 66-73 DOI:  
508 10.1111/ele.12385.

- 509 27. Conway, J.R., A. Lex, and N. Gehlenborg, *UpSetR: an R package for the visualization of*  
510 *intersecting sets and their properties*. *Bioinformatics*, 2017. **33**(18): p. 2938-2940 DOI:  
511 10.1093/bioinformatics/btx364.
- 512 28. Team, R.C. *R: A language and environment for statistical computing*. *R Foundation for*  
513 *Statistical Computing, Vienna, Austria*. 2022; Available from: [https://www.R-](https://www.R-project.org/)  
514 [project.org/](https://www.R-project.org/).
- 515 29. Wei, T.S., V. . *R package 'corrplot': Visualization of a Correlation Matrix. (Version 0.92)*.  
516 2021; Available from: <https://github.com/taiyun/corrplot>.
- 517 30. Mitri, C., E. Bischoff, E. Belda Cuesta, S. Volant, A. Ghazlane, K. Eiglmeier, I. Holm, C.  
518 Dieme, E. Brito-Fravallo, W.M. Guelbeogo, N. Sagnon, M.M. Riehle, and K.D. Vernick,  
519 *Leucine-Rich Immune Factor APL1 Is Associated With Specific Modulation of Enteric*  
520 *Microbiome Taxa in the Asian Malaria Mosquito Anopheles stephensi*. *Front Microbiol*,  
521 2020. **11**: p. 306 DOI: 10.3389/fmicb.2020.00306.
- 522 31. Xiao, X., L. Yang, X. Pang, R. Zhang, Y. Zhu, P. Wang, G. Gao, and G. Cheng, *A Mesh-Duox*  
523 *pathway regulates homeostasis in the insect gut*. *Nat Microbiol*, 2017. **2**: p. 17020 DOI:  
524 10.1038/nmicrobiol.2017.20.
- 525 32. Pang, X., X. Xiao, Y. Liu, R. Zhang, J. Liu, Q. Liu, P. Wang, and G. Cheng, *Mosquito C-type*  
526 *lectins maintain gut microbiome homeostasis*. *Nat Microbiol*, 2016. **1**: p. 16023 DOI:  
527 10.1038/nmicrobiol.2016.23.
- 528 33. Zhao, B., K.J. Lucas, T.T. Saha, J. Ha, L. Ling, V.A. Kokoza, S. Roy, and A.S. Raikhel,  
529 *MicroRNA-275 targets sarco/endoplasmic reticulum Ca<sup>2+</sup> adenosine triphosphatase*  
530 *(SERCA) to control key functions in the mosquito gut*. *PLoS Genet*, 2017. **13**(8): p.  
531 e1006943 DOI: 10.1371/journal.pgen.1006943.
- 532 34. Rose, N.H., M. Sylla, A. Badolo, J. Lutomiah, D. Ayala, O.B. Aribodor, N. Ibe, J. Akorli, S.  
533 Otoo, J.P. Mutebi, A.L. Kriete, E.G. Ewing, R. Sang, A. Gloria-Soria, J.R. Powell, R.E. Baker,  
534 B.J. White, J.E. Crawford, and C.S. McBride, *Climate and Urbanization Drive Mosquito*  
535 *Preference for Humans*. *Curr Biol*, 2020. **30**(18): p. 3570-3579 e6 DOI:  
536 10.1016/j.cub.2020.06.092.
- 537 35. Brown, J.E., C.S. McBride, P. Johnson, S. Ritchie, C. Paupy, H. Bossin, J. Lutomiah, I.  
538 Fernandez-Salas, A. Ponlawat, A.J. Cornel, W.C.t. Black, N. Gorrochotegui-Escalante, L.  
539 Urdaneta-Marquez, M. Sylla, M. Slotman, K.O. Murray, C. Walker, and J.R. Powell,  
540 *Worldwide patterns of genetic differentiation imply multiple 'domestications' of Aedes*  
541 *aegypti, a major vector of human diseases*. *Proc Biol Sci*, 2011. **278**(1717): p. 2446-54  
542 DOI: 10.1098/rspb.2010.2469.
- 543 36. Zhao, S.Y., G.L. Hughes, and K.L. Coon, *A cryopreservation method to recover laboratory-*  
544 *and field-derived bacterial communities from mosquito larval habitats*. *PLoS Negl Trop*  
545 *Dis*, 2023. **17**(4): p. e0011234 DOI: 10.1371/journal.pntd.0011234.
- 546 37. Coon, K.L., S. Hegde, and G.L. Hughes, *Interspecies microbiome transplantation*  
547 *recapitulates microbial acquisition in mosquitoes*. *Microbiome*, 2022. **10**(1): p. 58 DOI:  
548 10.1186/s40168-022-01256-5.  
549

**A)**

Alpha-diversity index: Chao1

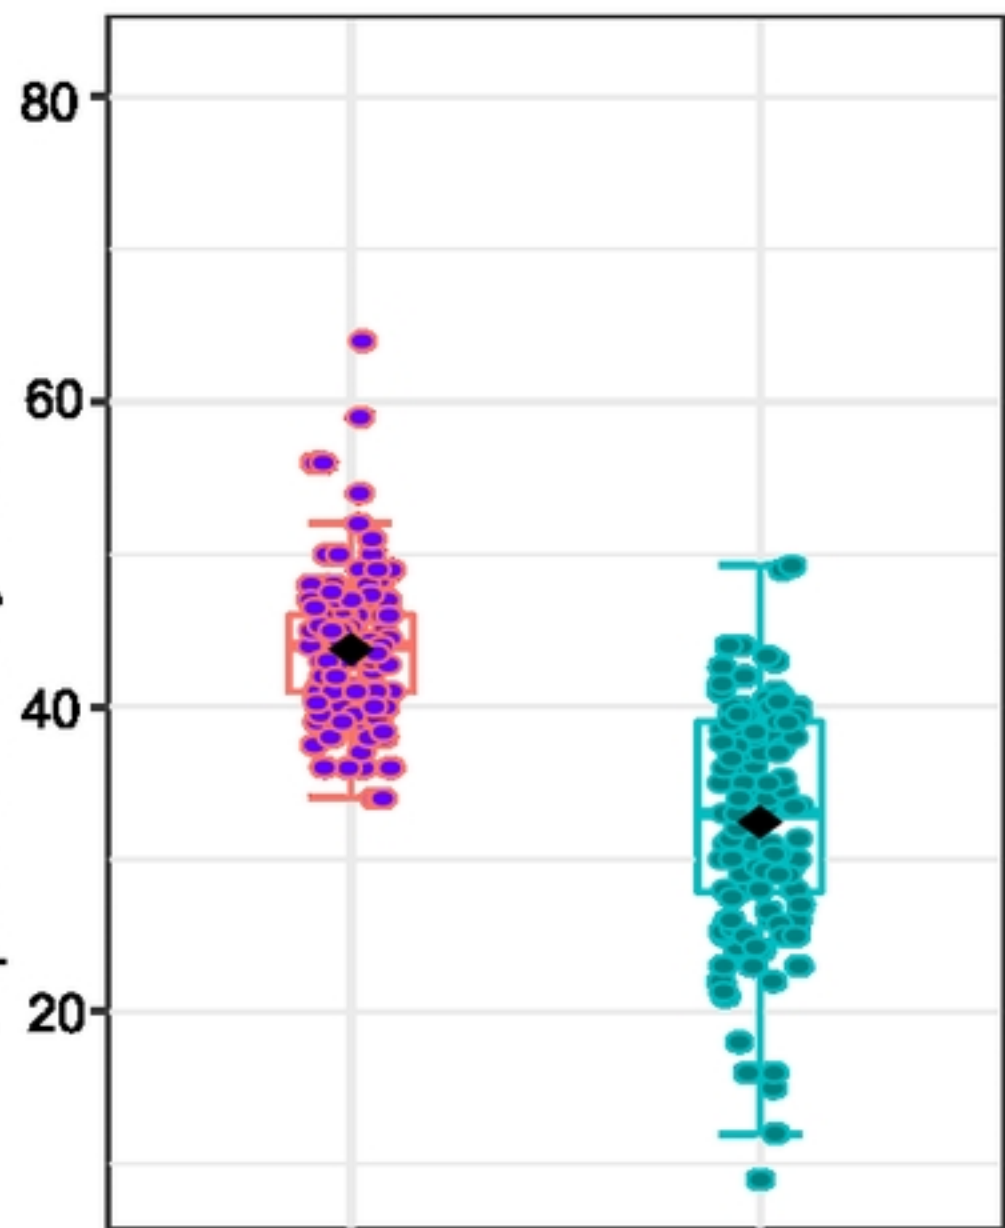**B)**

Axis 2 [13.2%]

-0.4

0.0

0.4

-0.3

0.0

0.3

Axis 1 [40.8%]

● LSTM

● UTMB

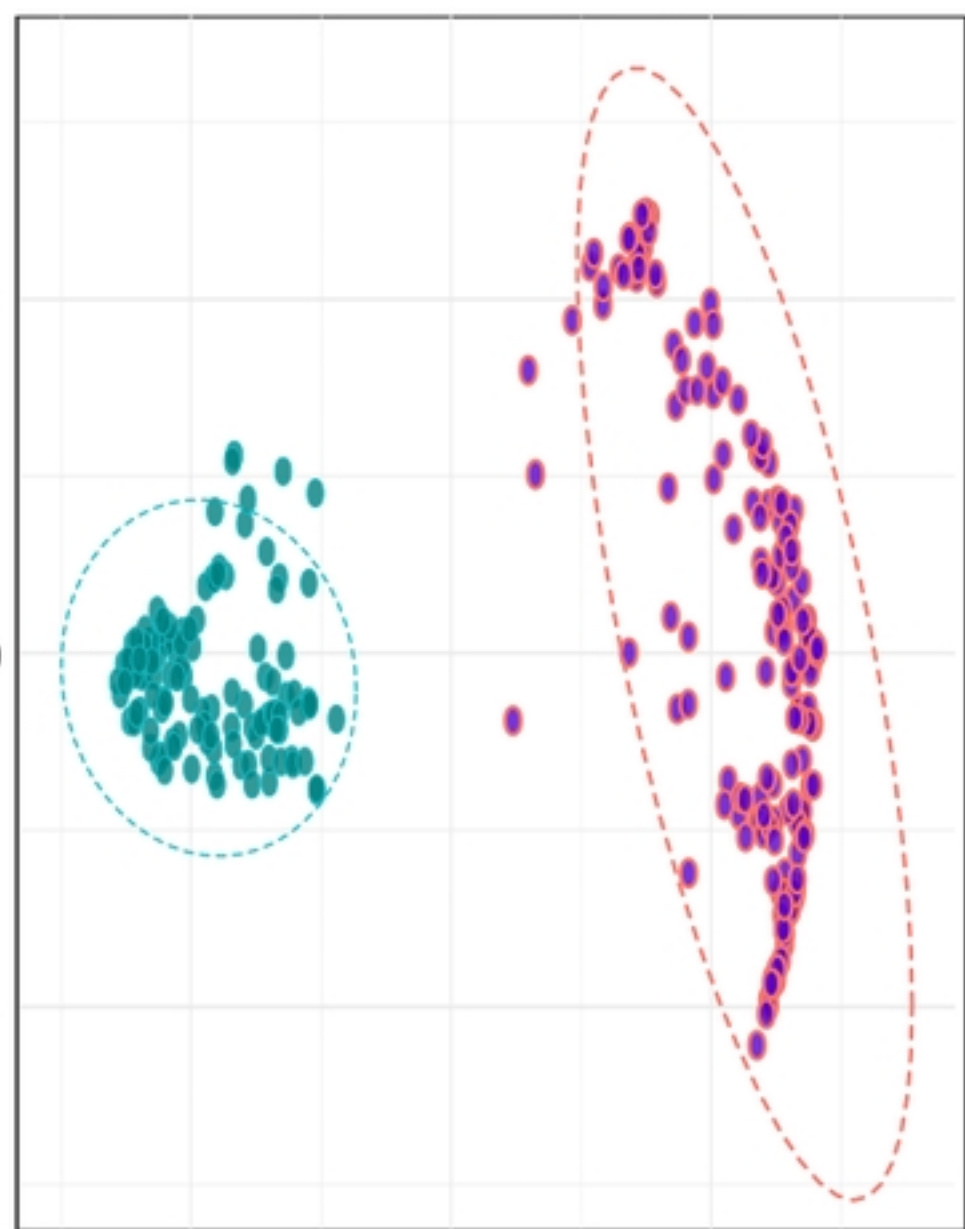

Figure 1



A)

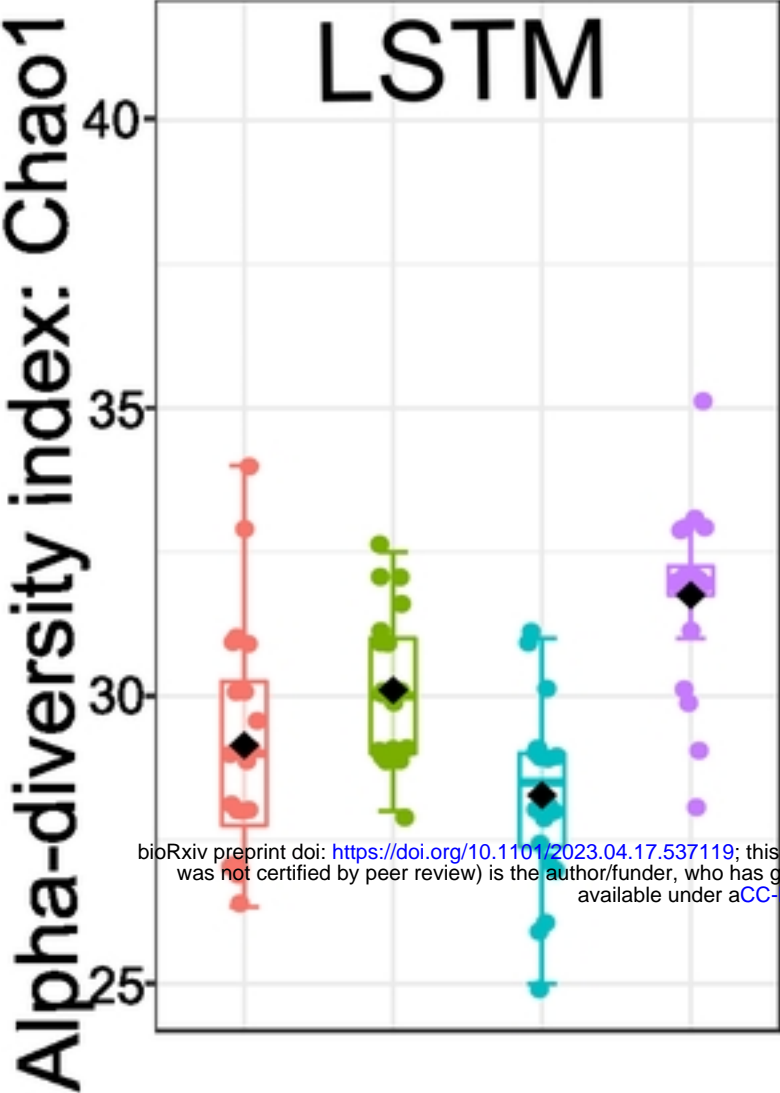

B)

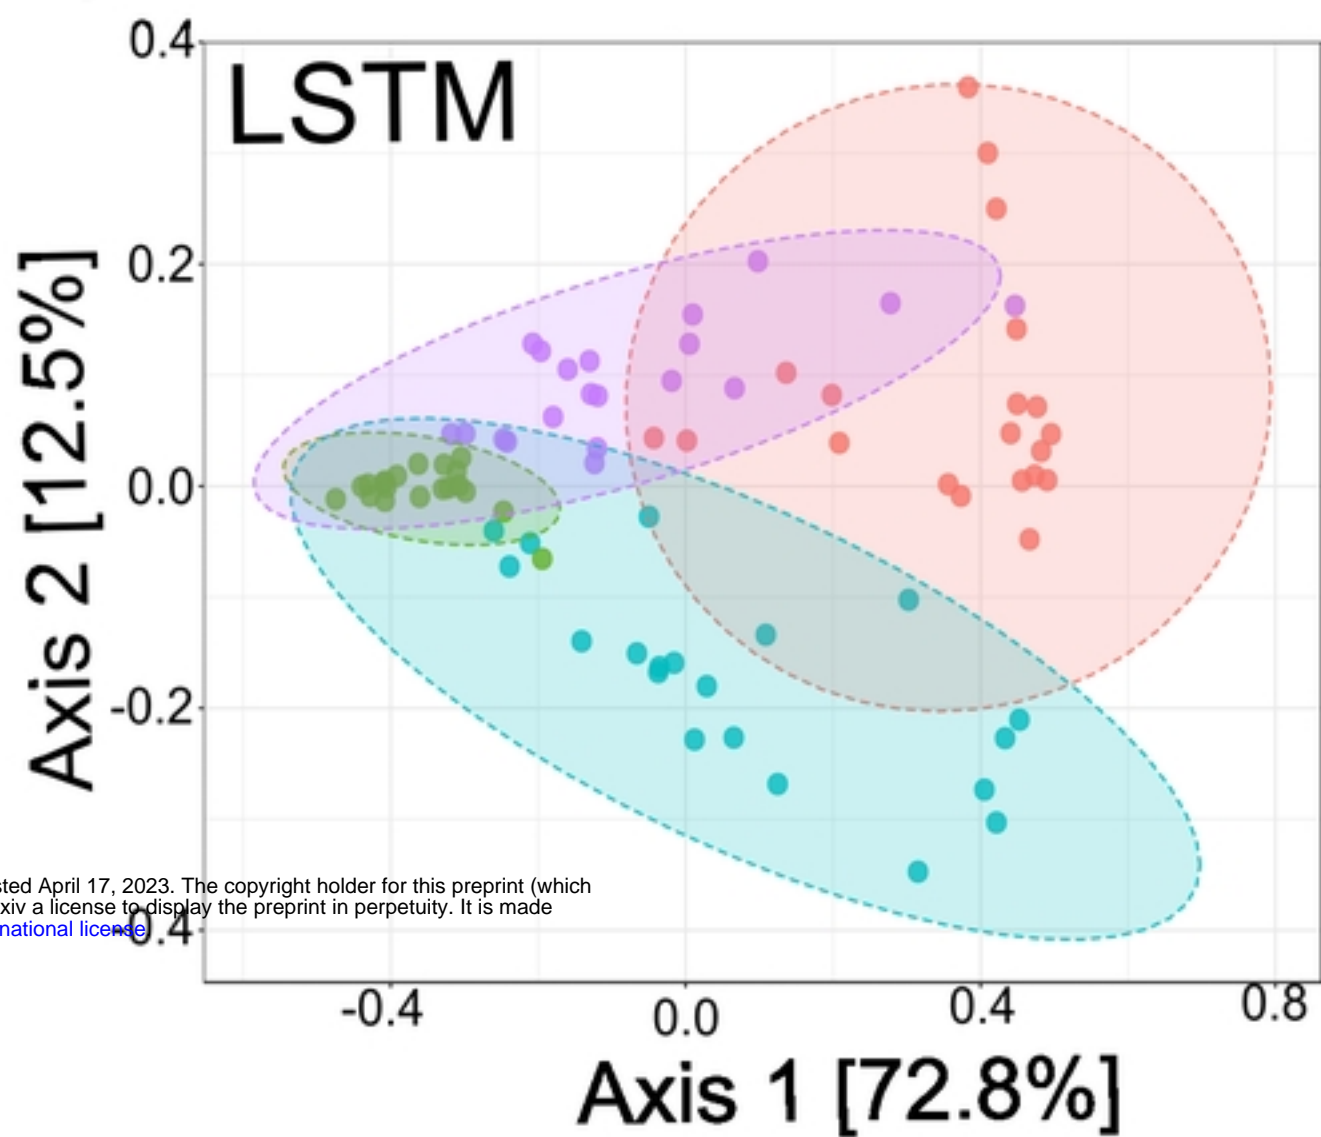

C)

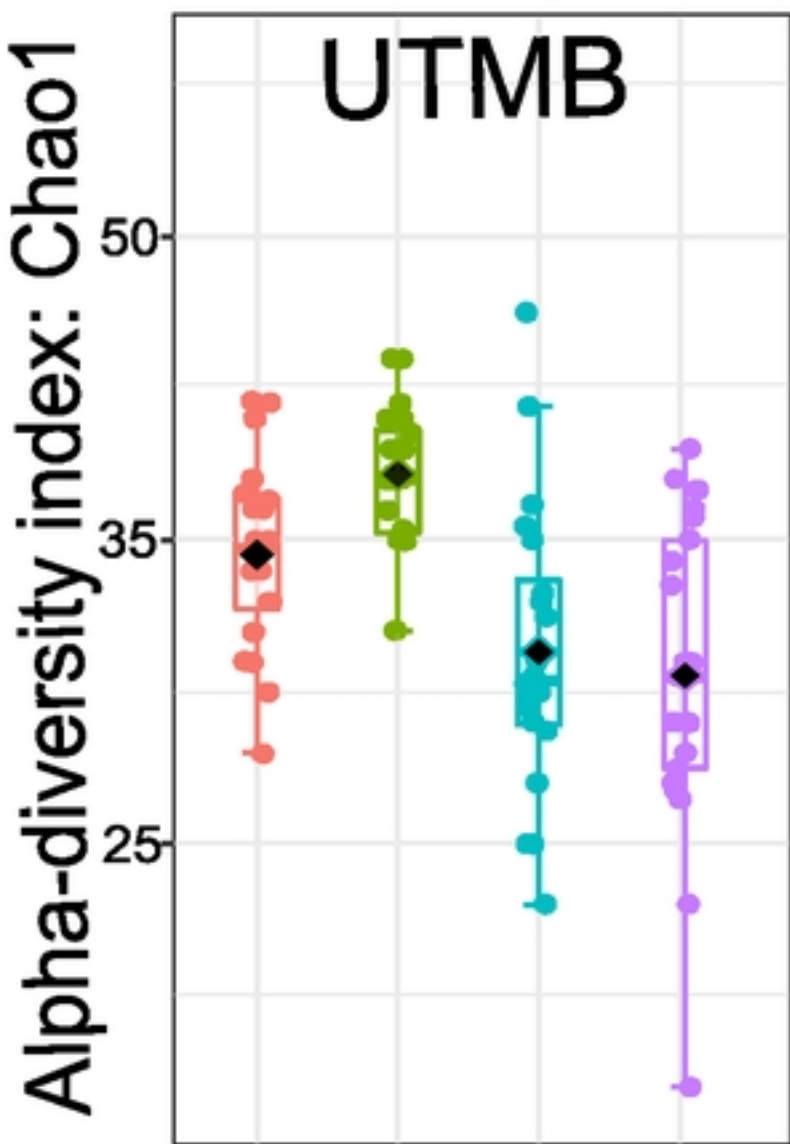

D)

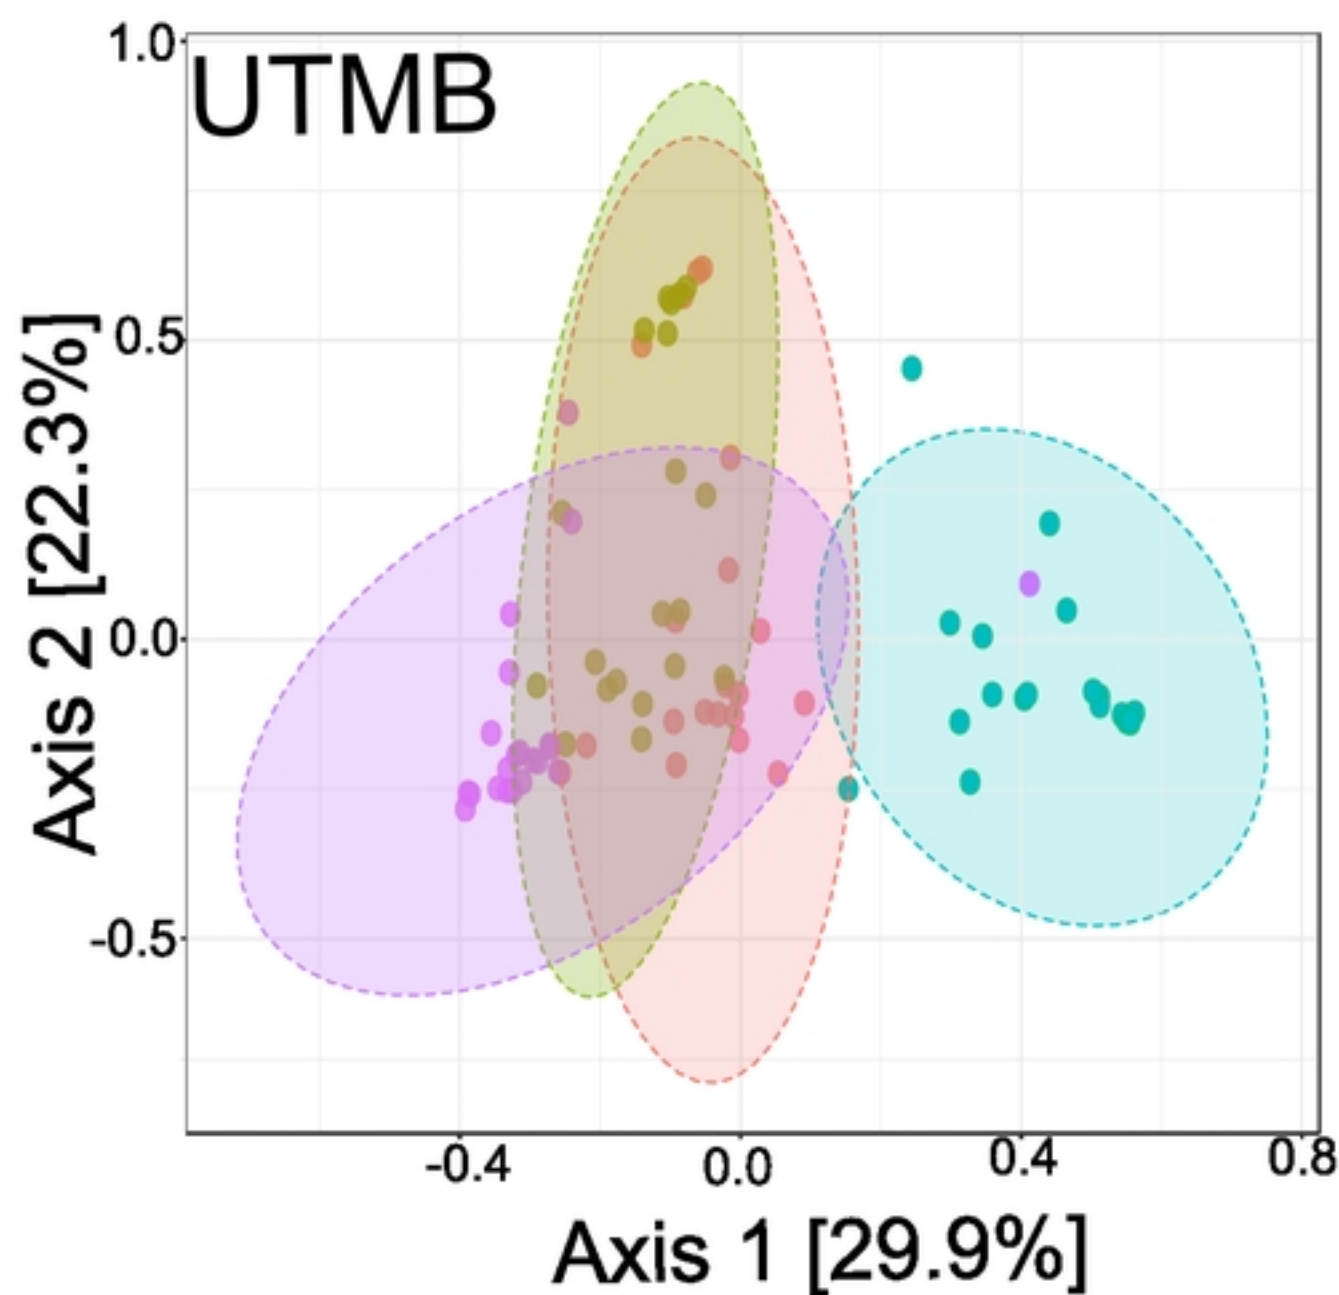

● Galveston ● Iquitos ● Juchitan ● Thailand

Figure 2

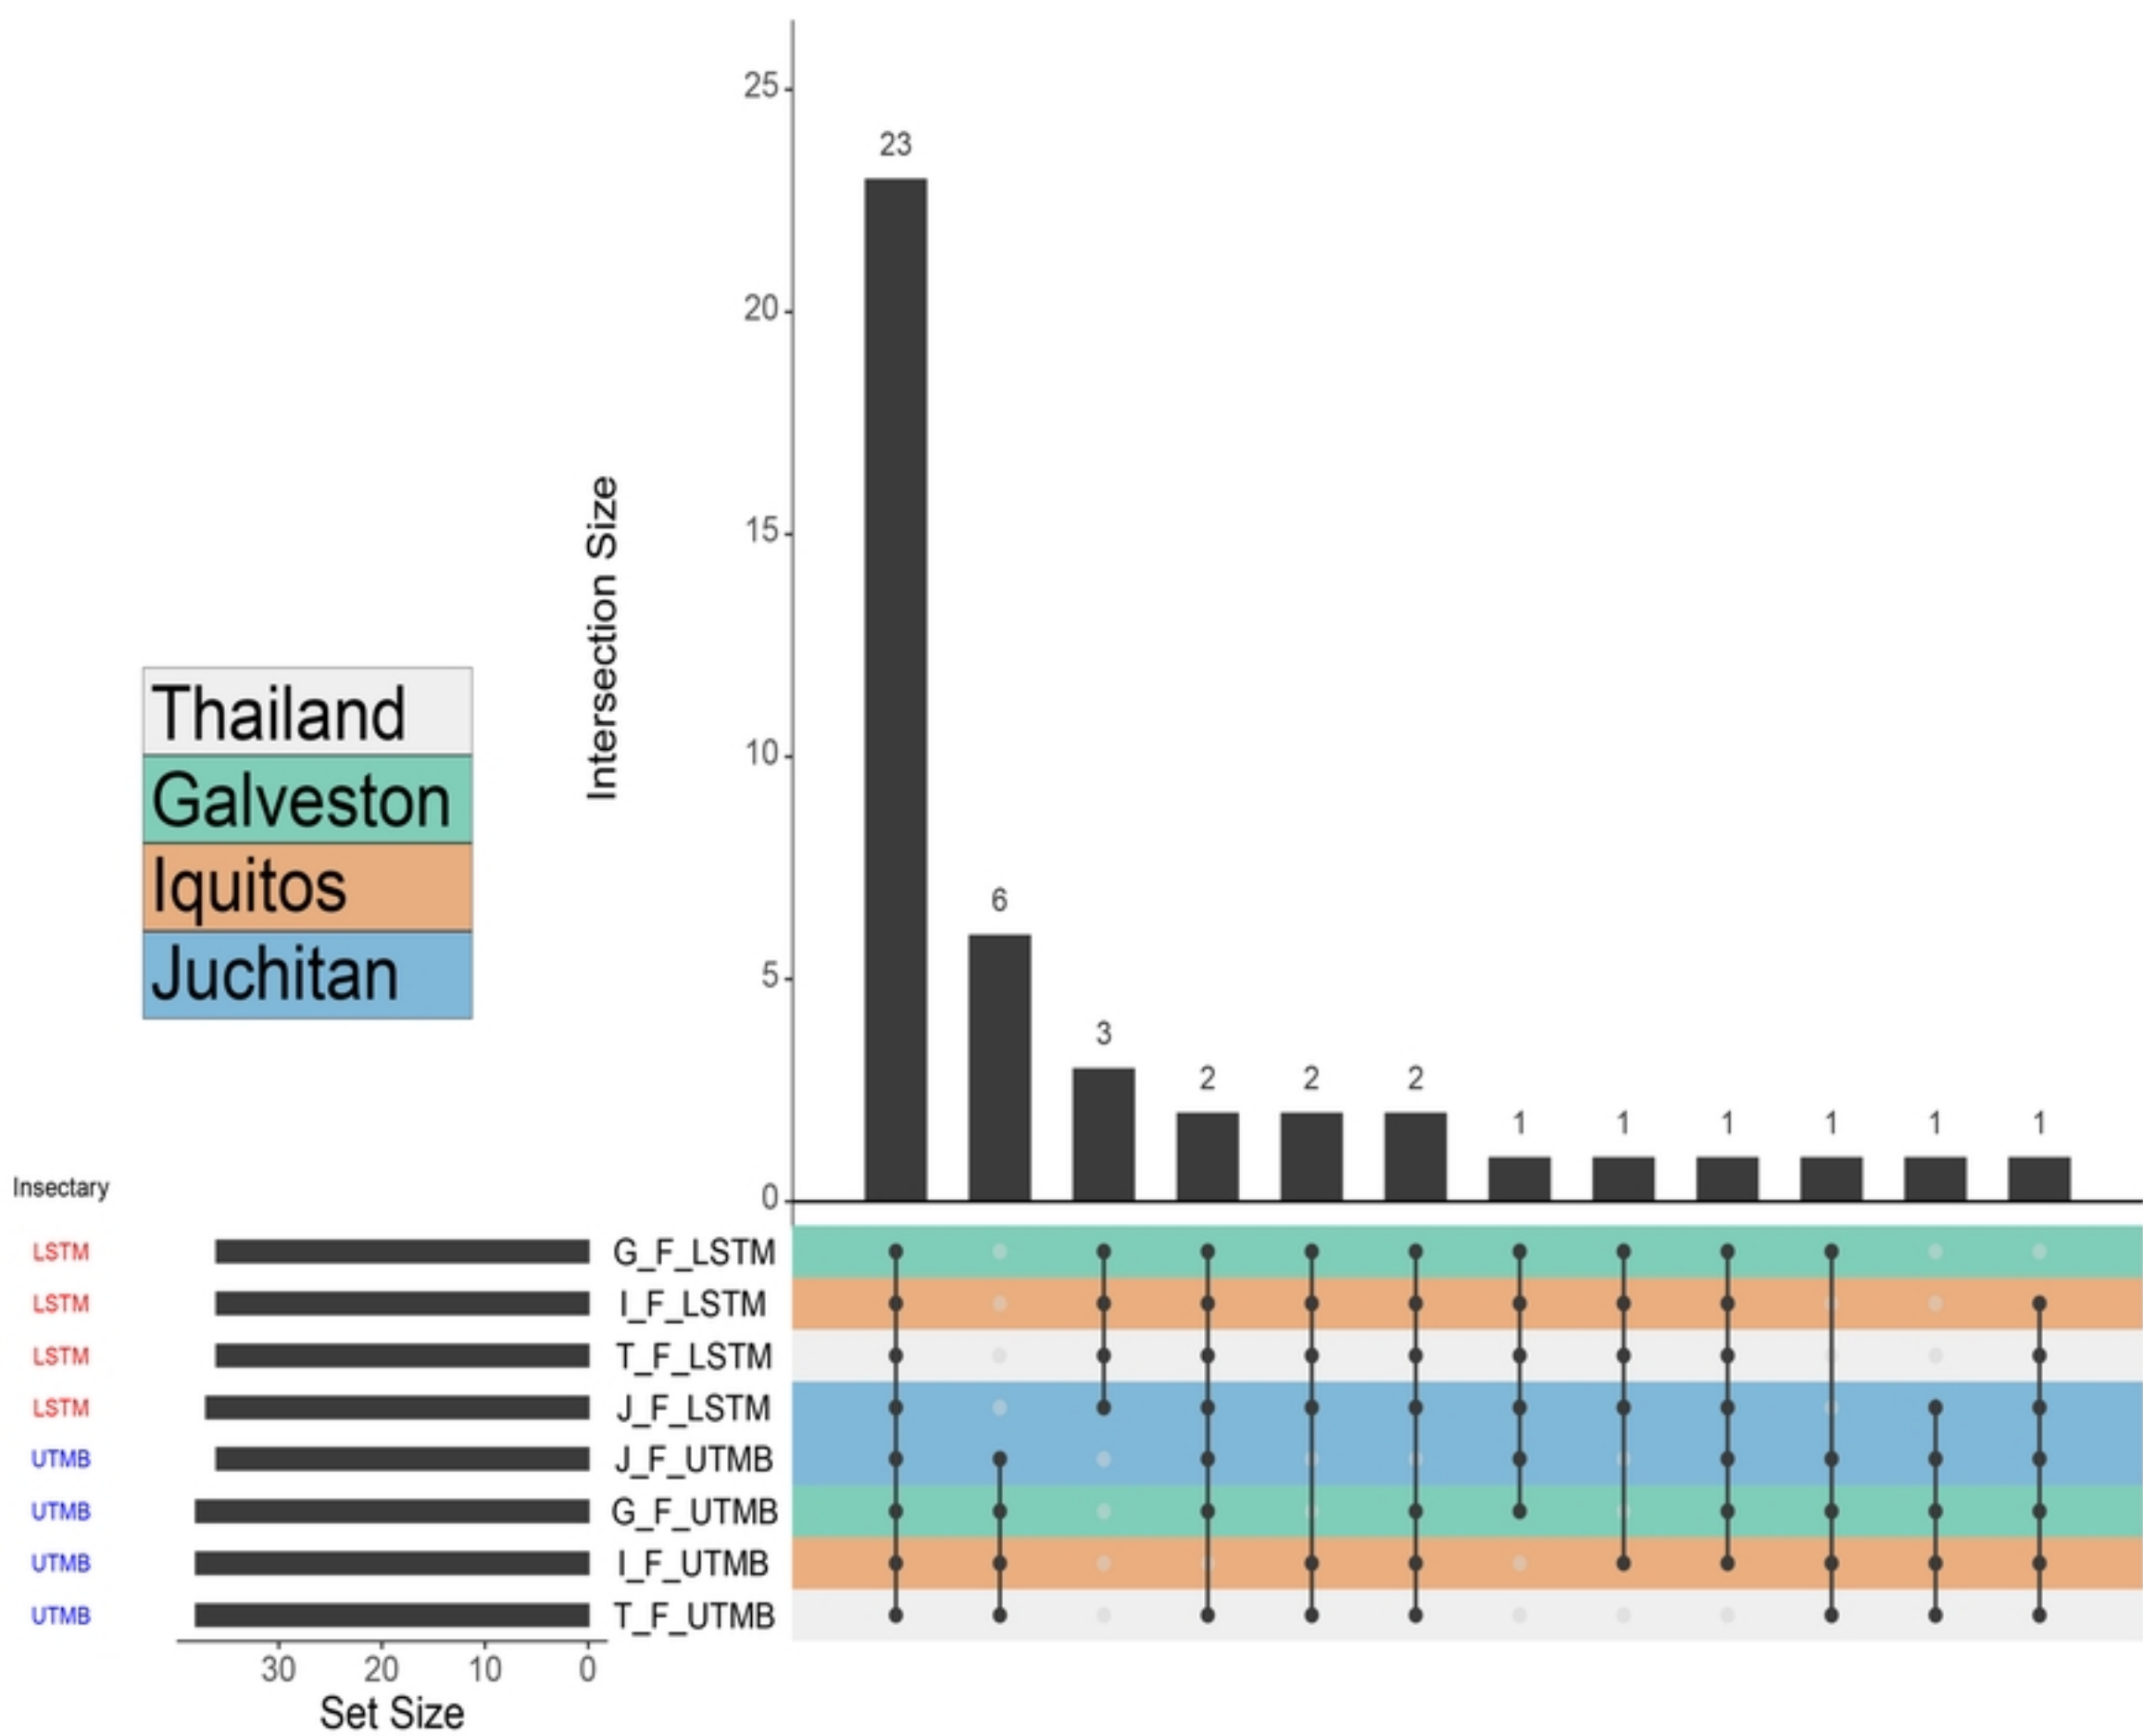

Figure 3

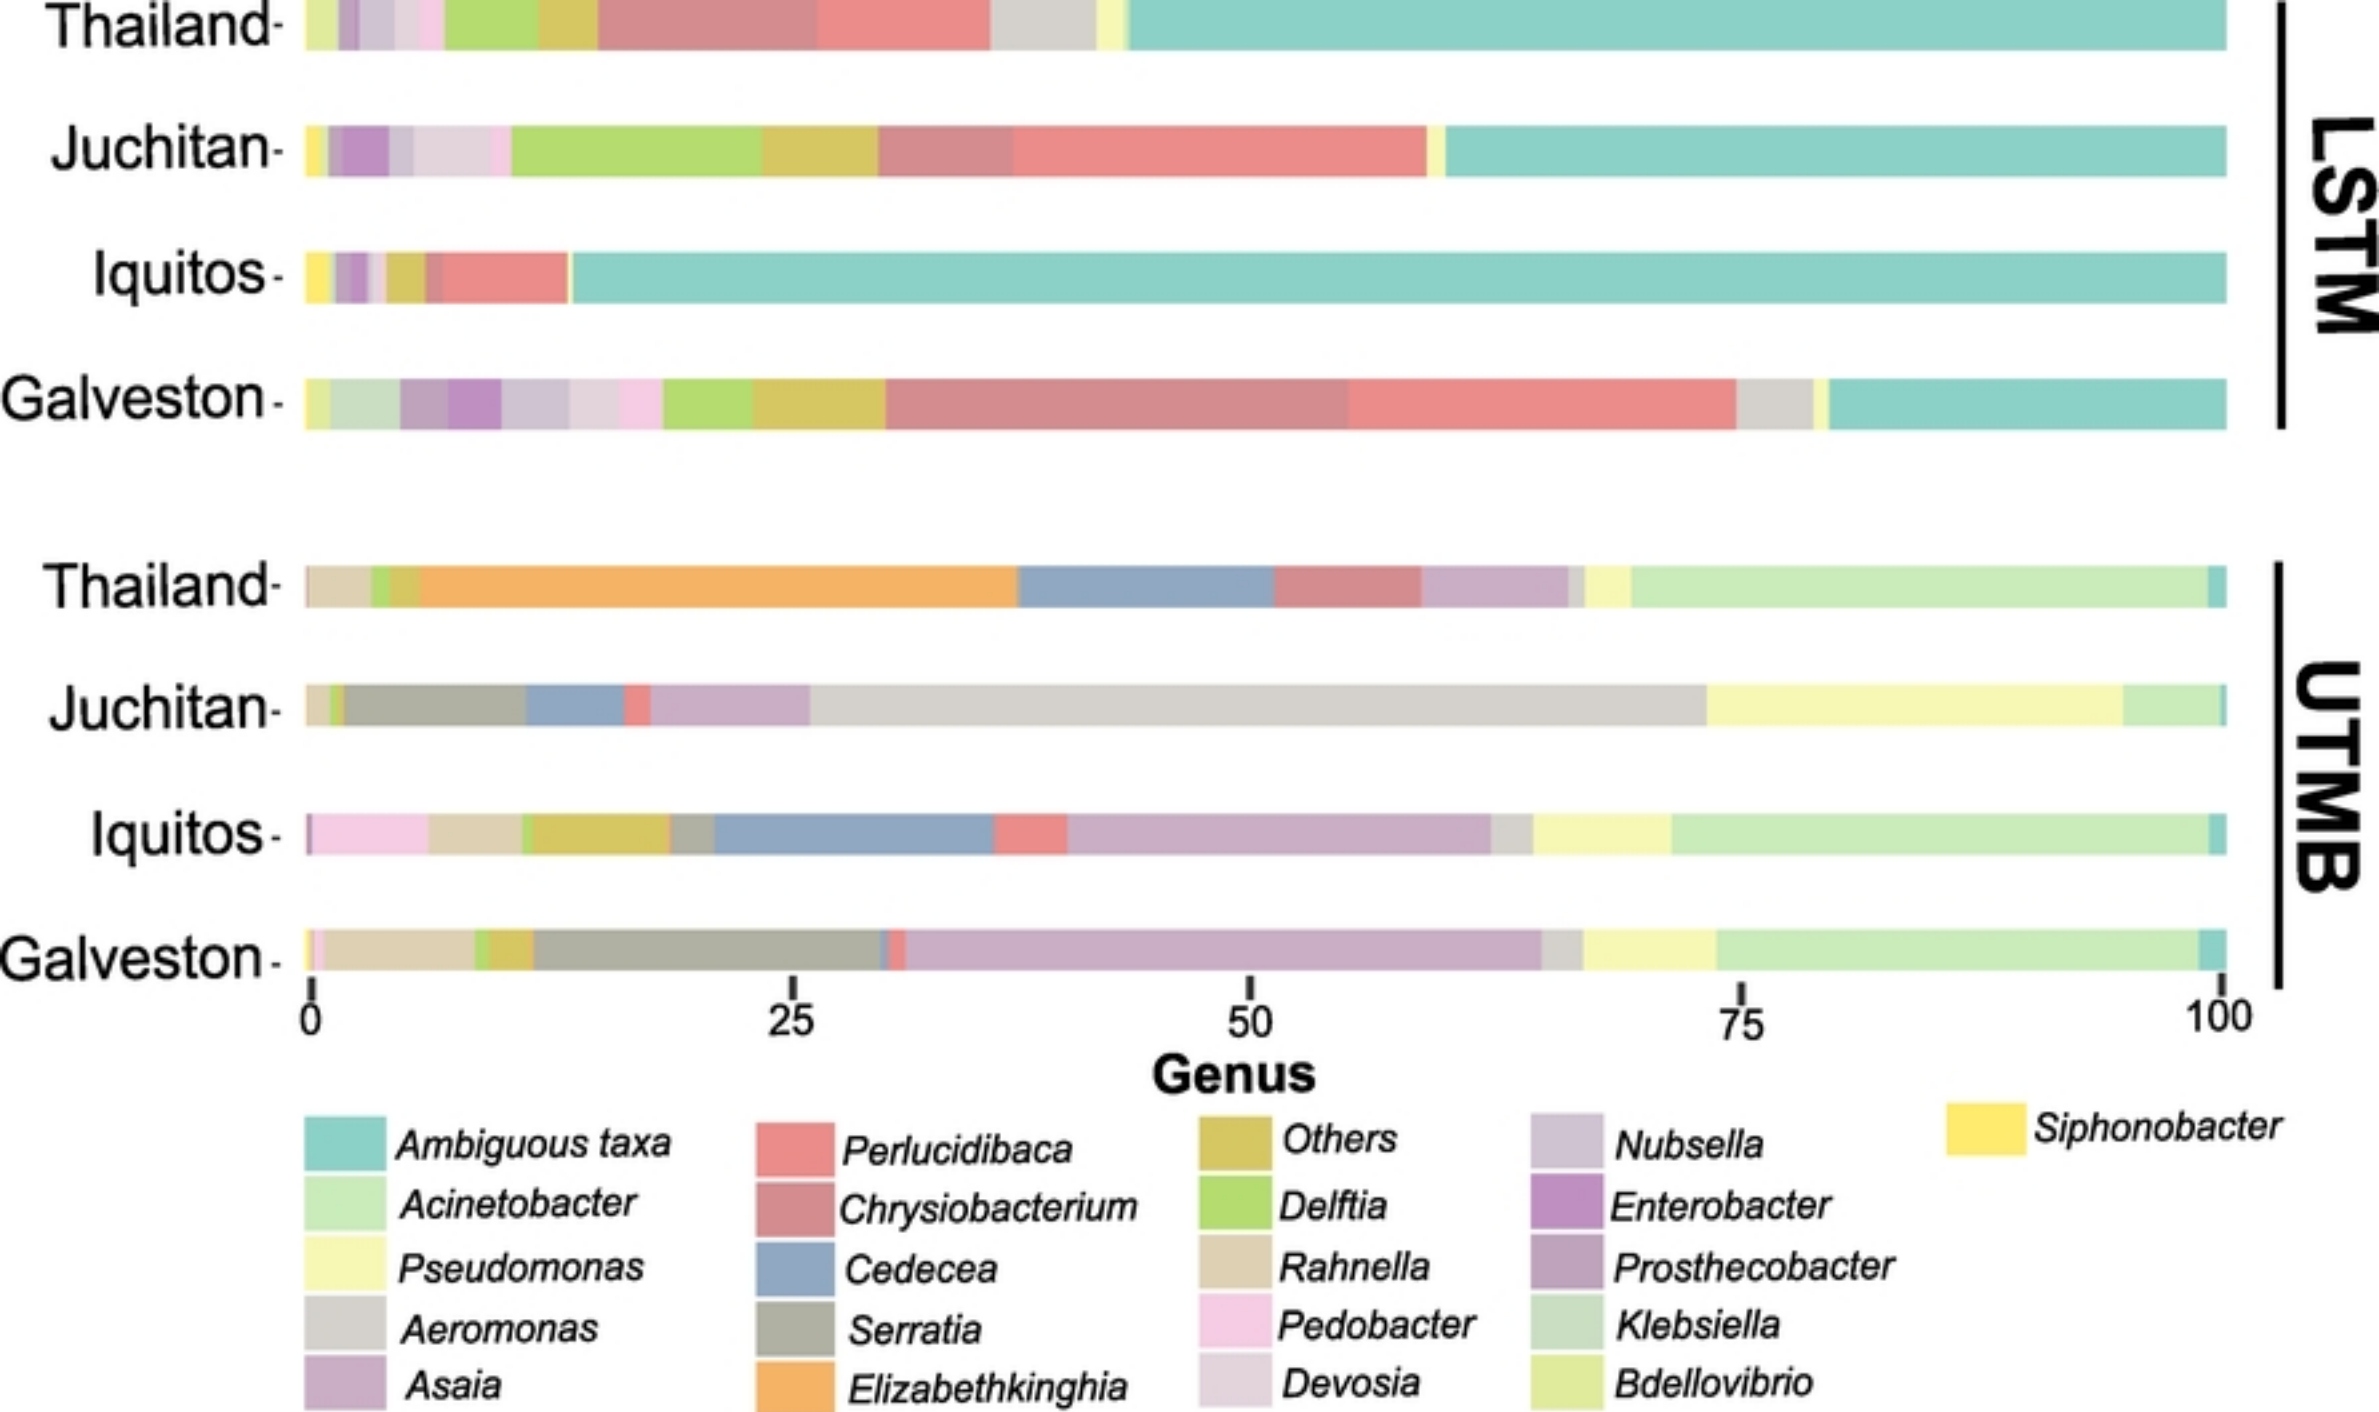

Figure 4



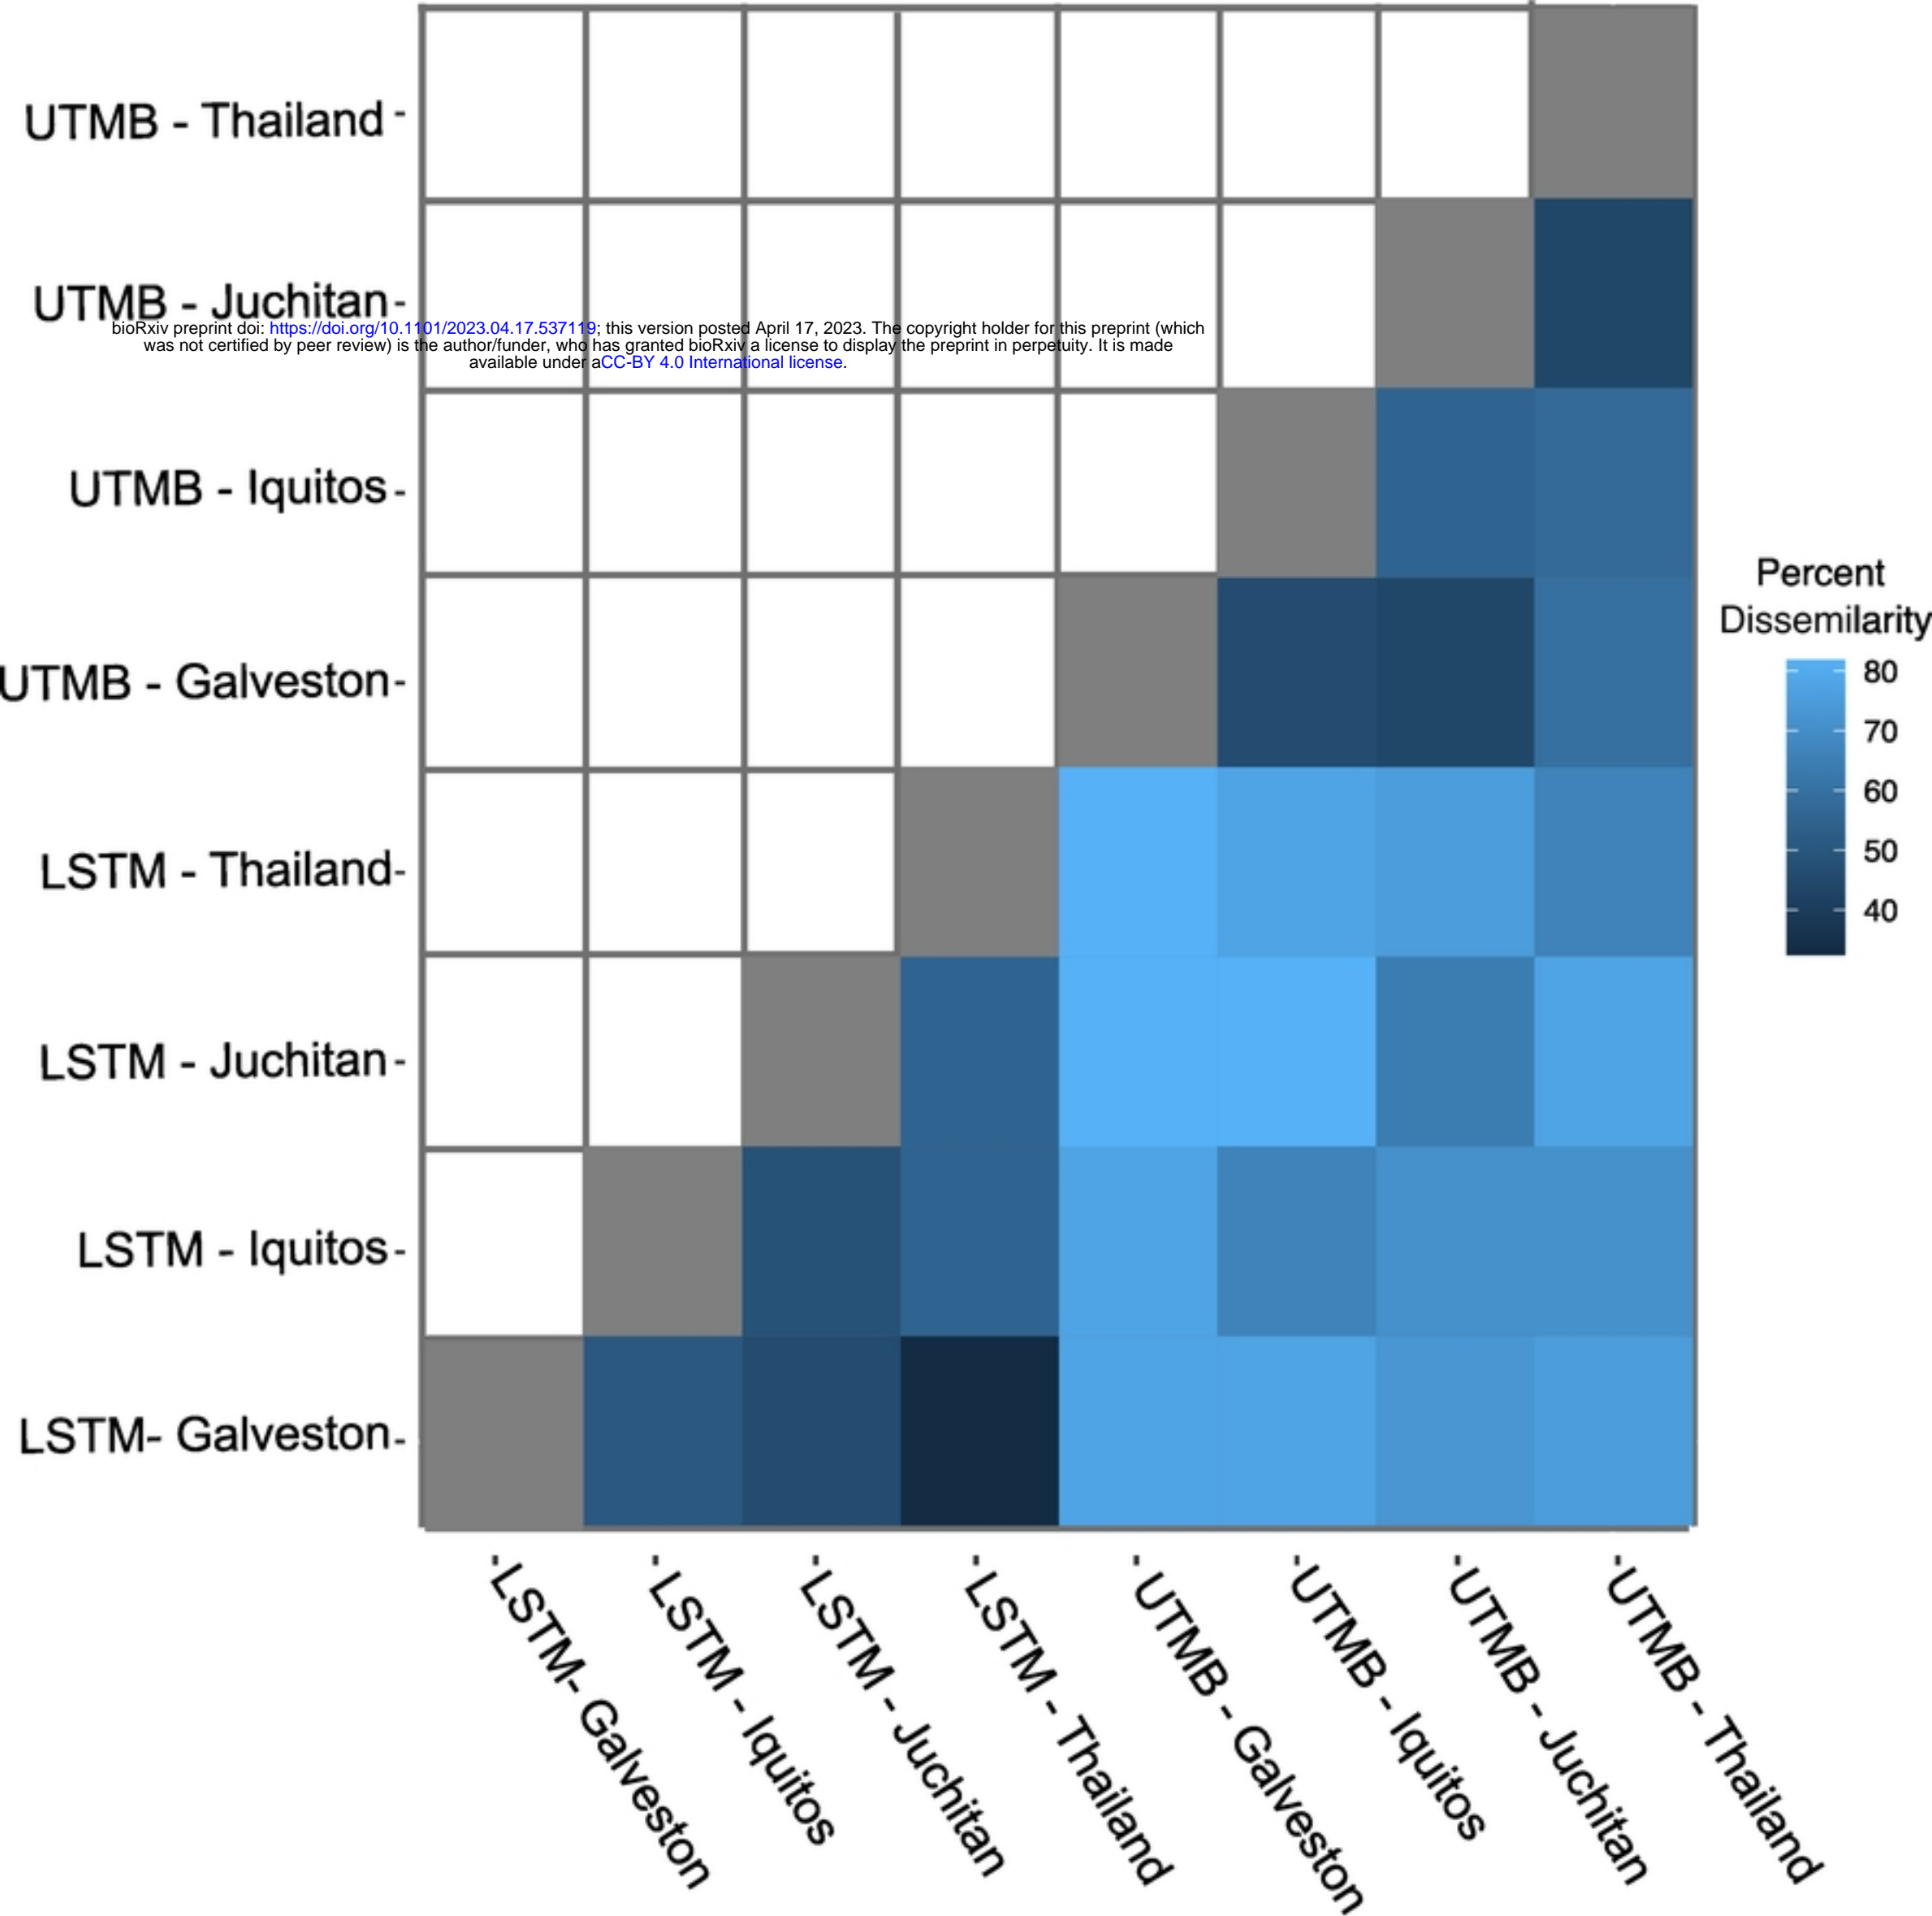

Figure 5

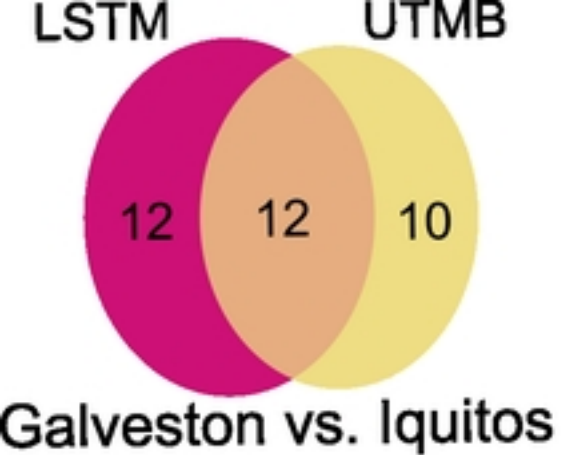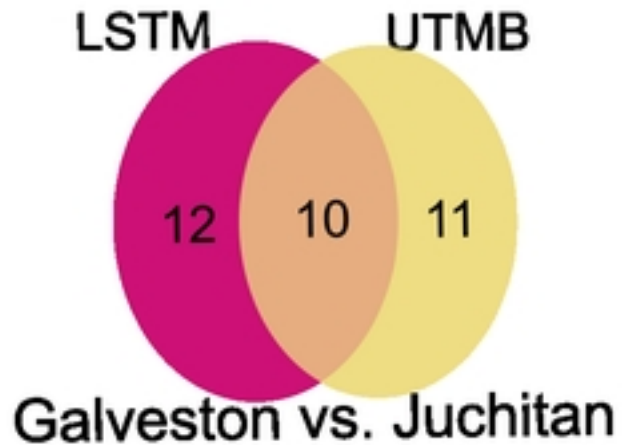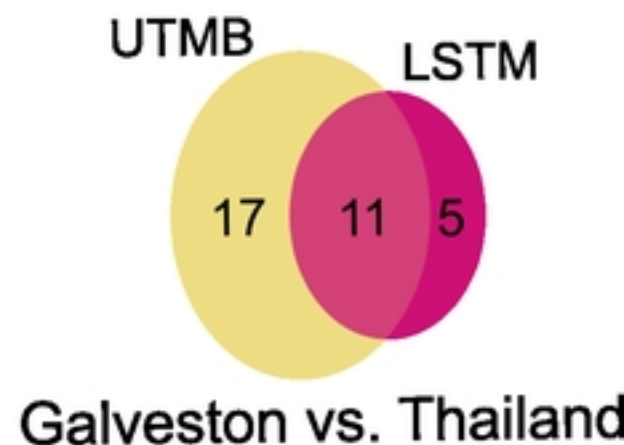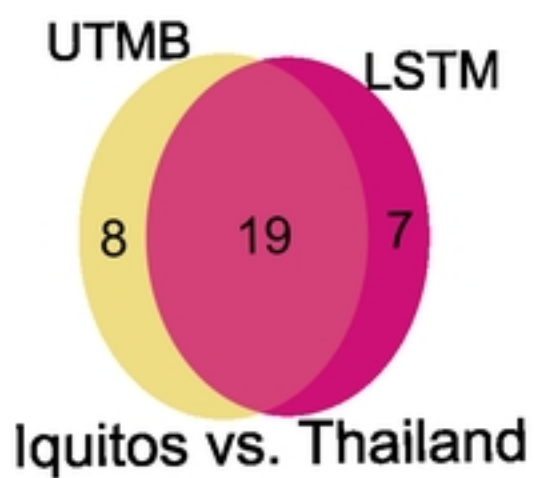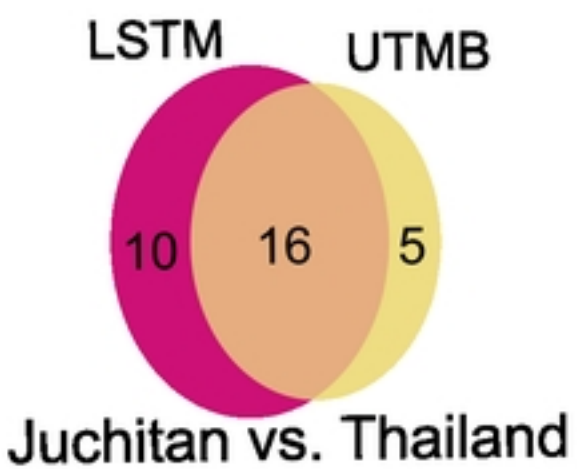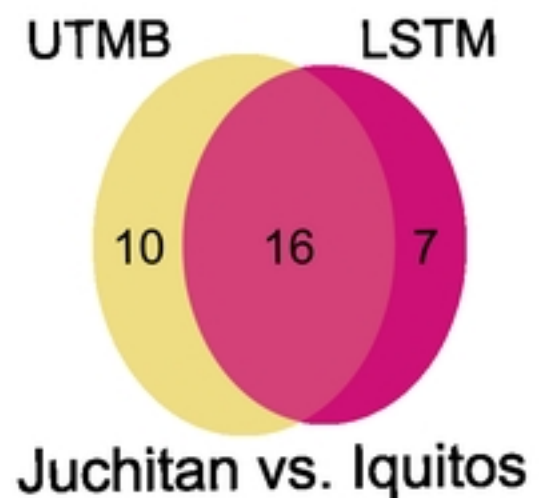

Figure 6
